# Supplementary material for: Knowledge translation dataset: An e-health intervention for pregnancy in inflammatory bowel disease
Source: PubMed Central journal article supplement (PMC6369406; doi:10.1016/j.dib.2018.12.085), 2018-12-30
Supplement: mmc1.pdf [file mmc1.pdf]

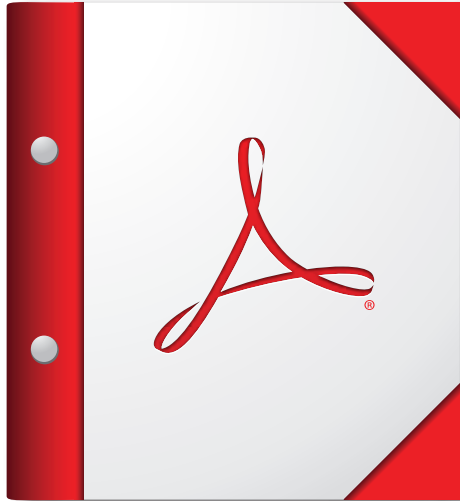

**For the best experience, open this PDF portfolio in  
Acrobat X or Adobe Reader X, or later.**

[Get Adobe Reader Now!](#)
